# Supplementary material
Source: PubMed Central journal article supplement (PMC7377368)
Supplement: ao0c02759_si_001.pdf [file ao0c02759_si_001.pdf]

## Supporting Information

### LC-Q-TOF-MS Characterization of Polyphenols from White Bayberry Fruit and Its Anti-diabetic Effect in KK-A<sup>y</sup> Mice

Yilong Liu<sup>1,†</sup>, Xianan Zhang<sup>2,†</sup>, Liuhuan Zhan<sup>1</sup>, Chang Xu<sup>1</sup>, Linxiao Sun<sup>3</sup>, Huamin Jiang<sup>4</sup>, Chongde Sun<sup>1</sup> and Xian Li<sup>1,\*</sup>

<sup>1</sup>Zhejiang Provincial Key Laboratory of Horticultural Plant Integrative Biology / The State Agriculture Ministry Laboratory of Horticultural Plant Growth, Development and Quality Improvement, Zhejiang University, Hangzhou, 310058, China

<sup>2</sup>Forestry and Fruit Research Institute, Shanghai Academy of Agricultural Sciences, Shanghai, 201403, China.

<sup>3</sup>Key Laboratory of Diagnosis and Treatment of Severe Hepato-Pancreatic Diseases of Zhejiang Province, Zhejiang Provincial Top Key Discipline in Surgery, Wenzhou Medical University First Affiliated Hospital, Wenzhou, 325000, China

<sup>4</sup>Hangzhou Lichuan Ecological Agriculture Development Co., Ltd., Hangzhou, 311123, China.

**†Co-first author:** These authors contributed equally to this work.

**\*Corresponding author:** E-mail: xianli@zju.edu.cn. Phone: (+86)-571-8898-1263.

Fax: (+86)-571-8898-2224.

**Table S1.** Polyphenols at a relative lower level identified by liquid chromatography quadrupole time-of-flight tandem mass spectrometry (LC-Q-TOF-MS) in 'Shui Jing' fruit extract (SJE).

| NO.                                      | Compound                                                      | RT <sup>1</sup><br>(min) | [M -H] <sup>-</sup><br>(m/z) | Molecular<br>Formula                            | Fragment ions<br>(Relative abundance)                                                                                 | Referen<br>ces | Content<br>(mg/100 g DW) |
|------------------------------------------|---------------------------------------------------------------|--------------------------|------------------------------|-------------------------------------------------|-----------------------------------------------------------------------------------------------------------------------|----------------|--------------------------|
| <i>Proanthocyanidins and derivatives</i> |                                                               |                          |                              |                                                 |                                                                                                                       |                |                          |
| ○11                                      | (E)GC-(E)GCG isomer <sup>2</sup>                              | 37.708                   | 761.1372                     | C <sub>37</sub> H <sub>30</sub> O <sub>18</sub> | 609.1293(14), 591.1175(16), 423.0726(100),<br>305.0656(35), 243.0296(16)                                              | 23             | 30.89 ± 0.21             |
| ○12                                      | (E)GC-(E)CG                                                   | 29.922                   | 745.1415                     | C <sub>37</sub> H <sub>30</sub> O <sub>17</sub> | 593.134(24), 575.1236(30), 423.074(100),<br>287.0557(29)                                                              | S1             | 30.47 ± 0.29             |
| ○13                                      | Galloyl- <i>bis</i> -HHDP- <i>O</i> -hexoside <sup>3</sup>    | 28.285                   | 935.0816                     | C <sub>41</sub> H <sub>28</sub> O <sub>26</sub> | 633.0798(100), 299.0205(53), 275.021(82)<br>423.0742(75), 913.1592(100), 761.1445(30),<br>591.1181(30)                | S2             | 19.32 ± 0.15             |
| ●14                                      | (E)GCG-(E)GCG isomer                                          | 43.82                    | 913.148                      | C <sub>44</sub> H <sub>34</sub> O <sub>22</sub> | 593.135(37), 575.1243(29), 423.074(100),<br>305.067(44), 287.0568(29)                                                 | 25             | 17.77 ± 0.23             |
| ○15                                      | (E)GC-(E)CG isomer                                            | 30.486                   | 745.1415                     | C <sub>37</sub> H <sub>30</sub> O <sub>17</sub> | 609.1296(18), 591.1189(19), 423.0736(100),<br>305.0669(32), 177.0199(17)                                              | S1             | 15.06 ± 0.20             |
| ○16                                      | (E)GC-(E)GCG isomer                                           | 22.999                   | 761.1361                     | C <sub>37</sub> H <sub>30</sub> O <sub>18</sub> | 633.0794(42), 300.9989(100), 275.0185(13)<br>879.1771(34), 761.1455(76), 593.0999(36),<br>591.1199(54), 423.0739(100) | S2             | 11.02 ± 0.41             |
| ○17                                      | Galloyl- <i>bis</i> -HHDP- <i>O</i> -hexoside isomer          | 38.931                   | 935.0818                     | C <sub>41</sub> H <sub>28</sub> O <sub>26</sub> | 879.1514(72), 761.1437(82), 423.0736(100)<br>897.1614(52), 879.1521(80), 761.1441(81),<br>727.1383(58), 423.0743(100) | S3             | 8.56 ± 0.01              |
| ●18                                      | (E)GCG-(E)GC-(E)C                                             | 34.415                   | 1049.2014                    | C <sub>52</sub> H <sub>42</sub> O <sub>24</sub> |                                                                                                                       | S3             | 7.06 ± 0.08              |
| ○19                                      | Taraninin                                                     | 30.668                   | 1065.1953                    | C <sub>52</sub> H <sub>42</sub> O <sub>25</sub> |                                                                                                                       | S3             | 5.73 ± 0.08              |
| ○20                                      | Taraninin isomer                                              | 30.215                   | 1065.1953                    | C <sub>52</sub> H <sub>42</sub> O <sub>25</sub> |                                                                                                                       | S3             |                          |
| <i>Flavonoid glycosides</i>              |                                                               |                          |                              |                                                 |                                                                                                                       |                |                          |
| Δ21                                      | Isorhamnetin xyloside                                         | 53.297                   | 447.0933                     | C <sub>21</sub> H <sub>20</sub> O <sub>11</sub> | 285.0402(47), 284.0327(100), 255.0298(89),<br>227.0345(65), 315.0144(70)                                              | S4             | 26.32 ± 0.08             |
| Δ22                                      | Quercetin-3- <i>O</i> -glucoside (isoquercetrin) <sup>a</sup> | 46.948                   | 463.0876                     | C <sub>21</sub> H <sub>20</sub> O <sub>12</sub> | 301.0324(100), 271.0252(13), 255.0292(11)<br>300.0279(100), 301.0353(50), 271.0249(55),<br>255.0301(30)               | 17             | 24.32 ± 0.48             |
| Δ23                                      | Quercetin-3- <i>O</i> -galactoside (hyperoside)               | 45.932                   | 463.0893                     | C <sub>21</sub> H <sub>20</sub> O <sub>12</sub> |                                                                                                                       | 26             | 10.91 ± 0.19             |
| Δ24                                      | Quercetin                                                     | 67.165                   | 301.0354                     | C <sub>15</sub> H <sub>10</sub> O <sub>7</sub>  | 151.0037(100), 178.9984(30), 301.0347 (100)                                                                           | S5             | 0.91 ± 0.02              |

Table S1. Cont.

| NO.                                  | Compound                                                                   | RT <sup>1</sup><br>(min) | [M -H] <sup>-</sup><br>(m/z) | Molecular<br>Formula                            | Fragment ions<br>(Relative abundance)                                               | References | Content<br>(mg/100 g DW) |
|--------------------------------------|----------------------------------------------------------------------------|--------------------------|------------------------------|-------------------------------------------------|-------------------------------------------------------------------------------------|------------|--------------------------|
| <i>Phenolic acid and derivatives</i> |                                                                            |                          |                              |                                                 |                                                                                     |            |                          |
| ■25                                  | Methylelagic acid glucuronide                                              | 48.620                   | 491.0467                     | C <sub>21</sub> H <sub>16</sub> O <sub>14</sub> | 315.0179(5), 300.9939(7)                                                            | S6         | 42.07 ± 0.22             |
| ■26                                  | Ellagic acid <sup>a</sup>                                                  | 45.489                   | 300.9992                     | C <sub>14</sub> H <sub>6</sub> O <sub>8</sub>   | 283.9960(20), 229.0141(10), 245.0080(10)                                            | S7         | 36.66 ± 0.90             |
| ■27                                  | Dimethyl-ellagic acid-glucuronide                                          | 66.060                   | 505.0617                     | C <sub>22</sub> H <sub>18</sub> O <sub>14</sub> | 329.0312(100), 314.0071(51), 298.9835(24),<br>285.0034(7), 270.988(7)               | S8         | 28.55 ± 0.02             |
| ■28                                  | Ellagic acid 3,3'-dimethyl<br>ether- <i>O</i> -β-D-glucopyranoside         | 59.239                   | 491.0822                     | C <sub>22</sub> H <sub>20</sub> O <sub>13</sub> | 329.0303(100), 314.0067(42), 298.9832(18),<br>285.0028(10)                          | S9,S10     | 21.81 ± 0.29             |
| ■29                                  | 4- <i>O</i> -[β-D-xylopyranosyl]-3,3'-di- <i>O</i> -methyl<br>ellagic acid | 66.787                   | 461.072                      | C <sub>21</sub> H <sub>18</sub> O <sub>12</sub> | 329.0314(100), 328.0233(11.572), 314.0076(43),<br>298.9832(25), 270.9867(11)        | S11        | 20.61 ± 0.06             |
| □30                                  | <i>p</i> -Coumaric acid <sup>a</sup>                                       | 38.642                   | 163.0395                     | C <sub>9</sub> H <sub>8</sub> O <sub>3</sub>    | 119.0509(100), 163.0395(15)                                                         | S12        | 11.80 ± 0.03             |
| □31                                  | Coumaric acid hexoside                                                     | 22.210                   | 325.0928                     | C <sub>15</sub> H <sub>18</sub> O <sub>9</sub>  | 119.0508(100), 163.0399(70)                                                         | S13        | 11.18 ± 0.04             |
| □32                                  | Caffeic acid hexoside                                                      | 22.469                   | 341.0881                     | C <sub>15</sub> H <sub>18</sub> O <sub>9</sub>  | 135.0459(100), 179.0357(64)                                                         | S14        | 10.58 ± 0.04             |
| □33                                  | Vanillic acid 1- <i>O</i> -β-D-glucopyranosyl ester                        | 32.458                   | 329.0882                     | C <sub>14</sub> H <sub>18</sub> O <sub>9</sub>  | 221.045(5), 209.0449(12), 191.0356(23),<br>167.0356(100), 125.0248(7), 123.0459(36) | S15,S16    | 8.56 ± 0.02              |
| □34                                  | Caffeic acid hexoside isomer                                               | 17.837                   | 341.0883                     | C <sub>15</sub> H <sub>18</sub> O <sub>9</sub>  | 179.0360(100), 135.0462(81)                                                         | S14        | 6.79 ± 0.01              |
| □35                                  | Caffeic acid hexoside isomer                                               | 28.049                   | 341.0880                     | C <sub>15</sub> H <sub>18</sub> O <sub>9</sub>  | 179.0355(70), 135.0457(100)                                                         | S14        | 5.28 ± 0.04              |
| □36                                  | Ferulic acid hexoside                                                      | 21.063                   | 355.1034                     | C <sub>16</sub> H <sub>20</sub> O <sub>9</sub>  | 134.0378(100), 193.0506(65), 149.0603(30),<br>178.0264(20)                          | S17,S18    | 3.90 ± 0.08              |
| □37                                  | Ferulic acid hexoside isomer                                               | 27.161                   | 355.1039                     | C <sub>16</sub> H <sub>20</sub> O <sub>9</sub>  | 193.0499(100), 178.0267(61), 149.0606(30),<br>134.0377(91)                          | S17,S18    | 3.83 ± 0.08              |
| □38                                  | Coumaric acid hexoside isomer                                              | 17.579                   | 325.0934                     | C <sub>15</sub> H <sub>18</sub> O <sub>8</sub>  | 119.0504(100), 163.0403(39)                                                         | S13        | 3.72 ± 0.04              |

<sup>1</sup> RT: Retention time; <sup>2</sup> EGC: Epigallocatechin, EGCG: Epigallocatechin gallate; <sup>3</sup> HHDP: Hexahydroxydiphenoyl.

<sup>a</sup> Further confirmed in comparison with authentic standard and its quantitative analysis was on absolute.

Among proanthocyanidins (PAs) and derivatives (○), (E)GCG-(E)GCG was relatively quantified based on EGCG content (●), and others were relatively quantified based on EGC content.

Flavonoid glycosides (Δ) were relatively quantified based on isoquercetrin content.

Among phenolic acid and derivatives (□), ellagic acid derivatives were relatively quantified based on ellagic acid content (■) and others were relatively quantified according to the content of *p*-coumaric acid.

## REFERENCES

- (S1) Kuliev, R. Z. Accumulation dynamics of tanning agents and rhodioloside in *Rhodiola semenovii* rhizomes and roots. *Chem. Nat. Compd+*. **2010**, *46*, 643-644.
- (S2) Spínola, V.; Llorent-Martínez, E. J.; Castilho, P. C. Polyphenols of *Myrica faya* inhibit key enzymes linked to type II diabetes and obesity and formation of advanced glycation end-products (in vitro): potential role in the prevention of diabetic complications. *Food Res. Int.* **2019**, *116*, 1229-1238.
- (S3) Zhou, J.; Aybek, A.; Malik, A. Proanthocyanidins from seeds of *Fraxinus americana*. *Chem. Nat. Compd+*. **2018**, *54*(1), 183-184.
- (S4) Wang, M.; Cao, A.; Ouyang, C.; Li, Y.; Wei, Y. Rapid screening and identification of non-target flavonoid components in invasive weeds by LC/MS-IT-TOF. *Anal. Methods* **2015**, *7*, 10207.
- (S5) Mullen, W.; Yokota, T.; Lean, M. E.; Crozier, A. Analysis of ellagitannins and conjugates of ellagic acid and quercetin in raspberry fruits by LC-MS<sup>n</sup>. *Phytochemistry* **2003**, *64*, 617-624.
- (S6) D'Urso, G.; Pizza, C.; Piacente, S.; Montoro, P. Combination of LC-MS based metabolomics and antioxidant activity for evaluation of bioactive compounds in *Fragaria vesca* leaves from Italy. *J. Pharm. Biomed. Anal.* **2018**, *150*, 233-240.
- (S7) Zehl, M.; Braunberger, C.; Conrad, J.; Crnogorac, M.; Krasteva, S.; Vogler, B.; Beifuss, U.; Krenn, L. Identification and quantification of flavonoids and ellagic acid derivatives in therapeutically important *Drosera* species by LC-DAD, LC-NMR, NMR, and LC-MS. *Anal. Bioanal. Chem.* **2011**, *400*, 2565-2576.
- (S8) González-Sarriás, A.; Giménez-Bastida, J. A.; García-Conesa, M. T.; Gómez-Sánchez, M. B.; García-Talavera, N. V.; Gil-Izquierdo, A.; Sánchez-A'lvarez, C.; Fontana-Compiano, L. O.; Morga-Egea, J. P.;

- Pastor-Quirante, F. A.; Martínez-Díaz, F.; Tomás-Barberán, F. A.; Espín, J. C. Occurrence of urolithins, gut microbiota ellagic acid metabolites and proliferation markers expression response in the human prostate gland upon consumption of walnuts and pomegranate juice. *Mol. Nutr. Food Res.* **2010**, *54*, 311-322.
- (S9) Calderón, A. I.; Terreaux, C.; Gupta, M. P.; Hostettmann, K.; Schenk, K. J. Taxiphyllin from *Henriettella fascicularis*. *Acta Cryst.* **2003**, *C59*, o174-o176.
- (S10) Nawwar, M. A. M.; Buddrus, J.; Bauer, H. Dimeric phenolic constituents from the roots of *Tamarix nilotica*. *Phytochemistry* **1982**, *21*, 1755-1758
- (S11) Qin, B.; Perry, L. G.; Broeckling, C. D.; Du, J.; Stermitz, F. R.; Paschke, M. W.; Vivanco, J. M. Phytotoxic Allelochemicals from roots and root exudates of leafy spurge (*Euphorbia esula* L.). *Plant Signal. Behav.* **2006**, *1*, 323-327.
- (S12) Wang, X. L.; Zhou, Y.; Wang, P.; Xiao, W. Z. Wang, J. Z.; Lv, H. C.; Liu, H. Q. Rapid separation and identification of multiple constituents in vine tea by UFLC system coupled with Q-TOF-MS/MS. *J. Pharm. Innov.* **2015**, *7*, 10207-10216.
- (S13) Touriño, S.; Fuguet, E.; Jáuregui, O.; Saura-Calixto, F.; Cascante, M.; Torres, J. L. High-resolution liquid chromatography/electrospray ionization time-of-flight mass spectrometry combined with liquid chromatography/electrospray ionization tandem mass spectrometry to identify polyphenols from grape antioxidant dietary fiber. *Rapid Commun. Mass Spectrom.* **2008**, *22*, 3489-3500.
- (S14) Kadam, D.; Palamthodi, S.; Lele, S. S. LC-ESI-Q-TOF-MS/MS profiling and antioxidant activity of phenolics from *L. Sativum* seedcake. *J. Food Sci. Technol.* **2018**, *55*, 1154-1163.
- (S15) Balkrishna, A.; Das, S. K.; Pokhrel, S.; Joshi, A.; Laxmi; Verma, S.; Sharma, V. K.; Sharma, V.; Sharma, N.; Joshi, C. S. Colchicine: isolation, LC-MS QTof

screening, and anticancer activity study of *Gloriosa superba* seeds. *Molecules* **2019**, *24*, 2772.

(S16) Maier, C.; Conrad, J.; Carle, R.; Weiss, J.; Schweiggert, R. M. Phenolic constituents in commercial aqueous Quillaja (*Quillaja saponaria* Molina) wood extracts. *J. Agric. Food Chem.* **2015**, *63*, 1756-1762.

(S17) Piasecka, A.; Sawikowska, A.; Krajewski, P.; Kachlicki, P. Combined mass spectrometric and chromatographic methods for in-depth analysis of phenolic secondary metabolites in barley leaves. *J. Mass Spectrom.* **2015**, *50*, 513-532.

(S18) Conceição, N.; Albuquerque, B. R.; Pereira, C.; Corrêa, R. C. G.; Lopes, C. B.; Calheta, R. C.; Alves, M. J.; Barros, L.; Ferreira, I. C. F. R. By-Products of camu-camu [*Myrciaria dubia* (Kunth) McVaugh] as promising sources of bioactive high added-value food ingredients: functionalization of yogurts. *Molecules* **2019**, *25*, 70.
